# Supplementary material for: Evaluation of Cellular Immunity with ASFV Infection by Swine Leukocyte Antigen (SLA)—Peptide Tetramers
Source: Viruses. 2021 Nov 12;13(11):2264. doi: 10.3390/v13112264 (PMC8617699; doi:10.3390/v13112264)
Supplement: Supplementary file 1 [file viruses-13-02264-s001.zip › viruses-1418455-supplementary.pdf]

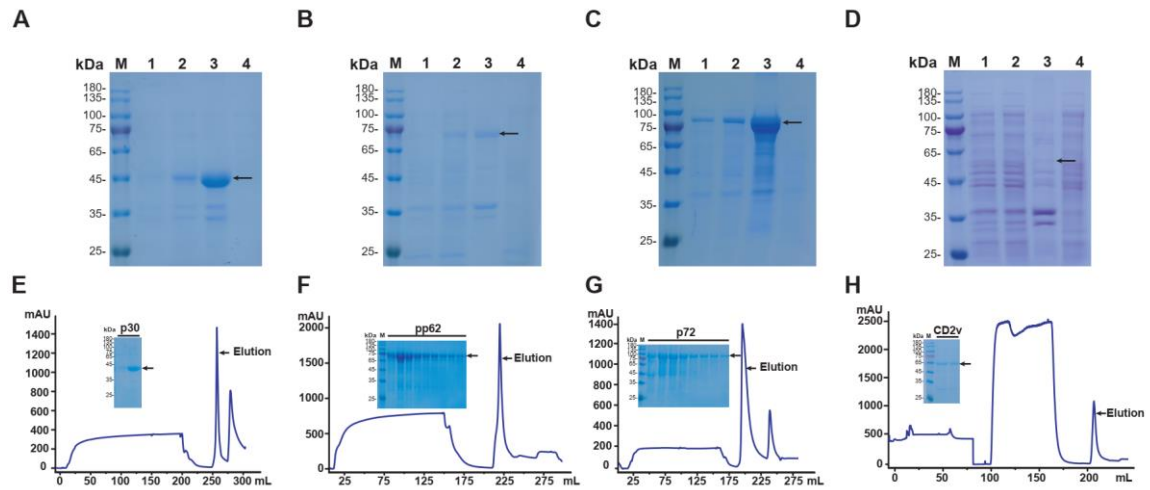

**Figure S1.** The expression and purification of ASFV proteins in *E. coli* BL21 was detected by SDS-PAGE. Related to Figure 1. SDS-PAGE data showing the expression of p30 (A), pp62 (B), p72 (C), and CD2v (D), respectively. ASFV proteins p30 (E), pp62 (F), p72 (G), and CD2v (H) expressed as inclusion bodies were purified by Ni-affinity chromatography by AKT protein purification system. M, Marker; 1, Before induction; 2, After induction; 3, Inclusion body; 4, Supernatant; Black arrow shows the location of the target protein.

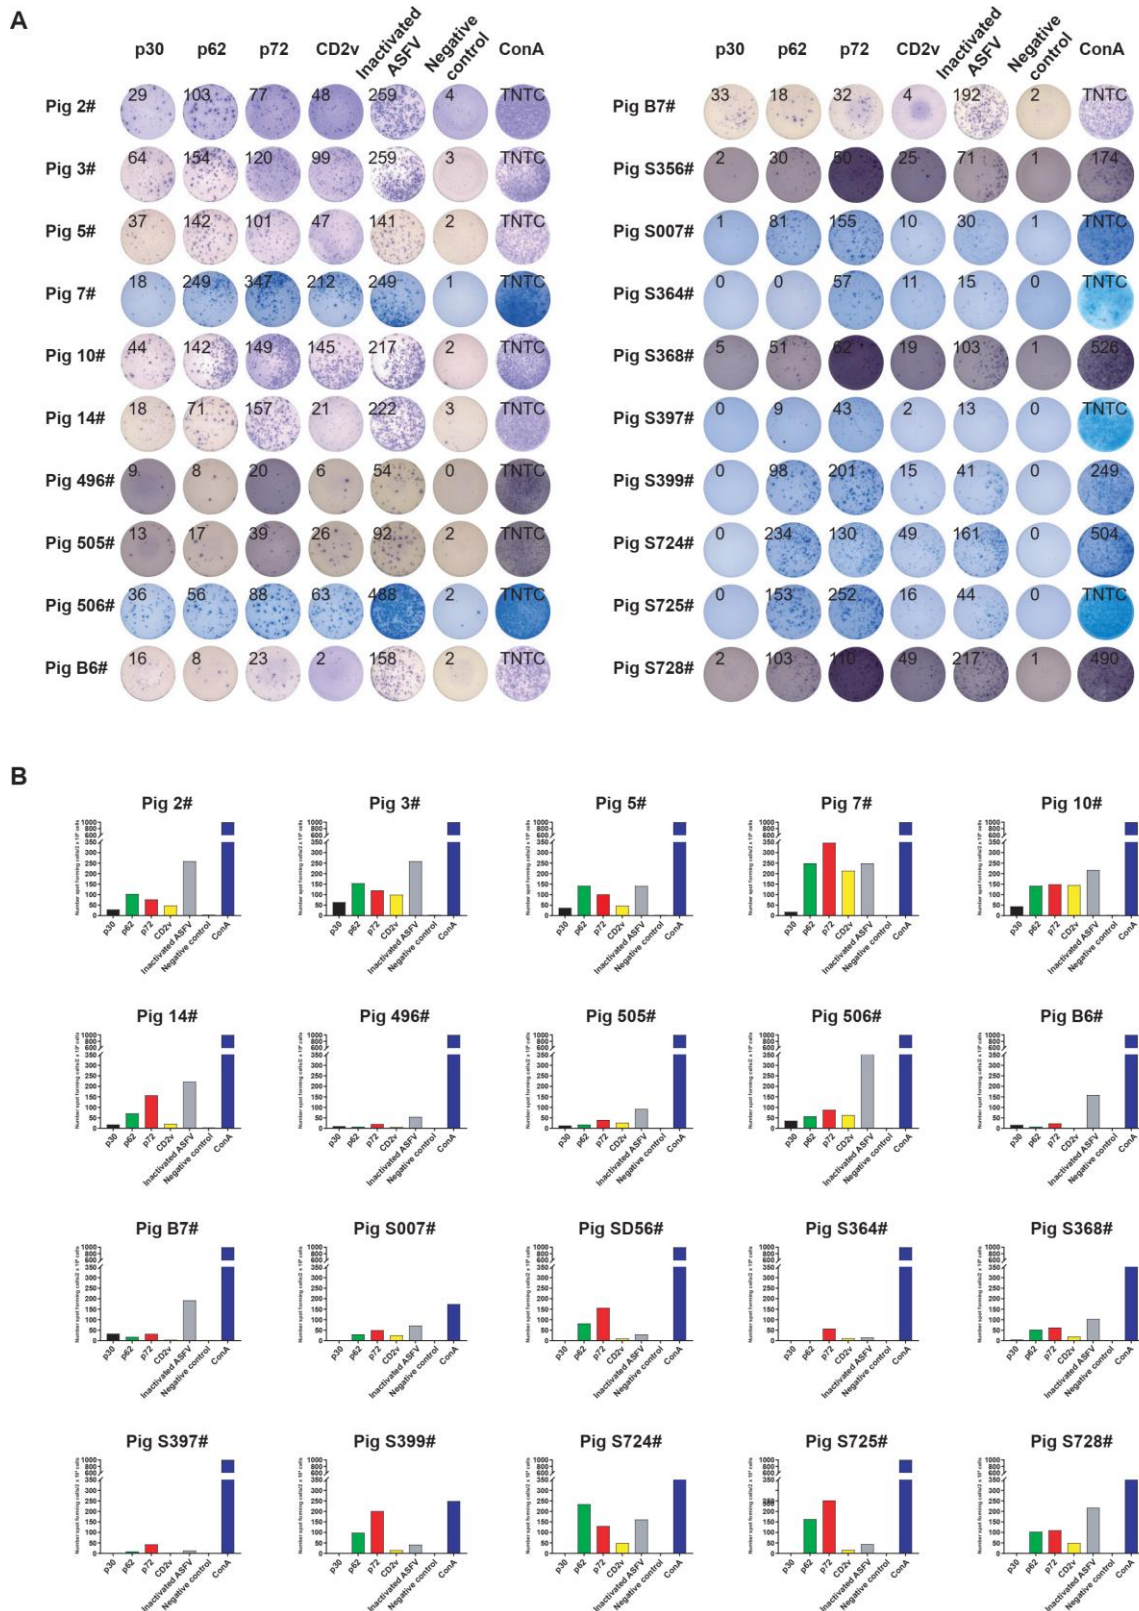

**Figure S2.** The ELISPOT assays of protein-specific T cells. Related to Figure 1. (A) The ELISPOT data showed immune spots formed by IFN- $\gamma$  secretion after PBMC stimulation in surviving pigs. PBMCs ( $2 \times 10^5$ /well) were stimulated with ASFV proteins at a final concentration of  $10 \mu\text{g/mL}$ . ConA was applied as a positive stimulus. The ELISPOT data were captured by an automatic ELISPOT reader, and the number of spots was analyzed by ImmunoCapture 6.5.0 software. (B) Statistical analysis of the proportion of spots per surviving pig.

| Positon | P334 | SLA-1*0101<br>Interacting Residues | P351 | SLA-3*0301<br>Interacting Residues          | P366 | SAL-1*1201<br>Interacting Residues |
|---------|------|------------------------------------|------|---------------------------------------------|------|------------------------------------|
| P1      | S    | GLU-166                            | S    | TYR-7; TYR-59; GLU-63                       | S    | GLU-170; GLU-63                    |
| P2      | L    | /                                  | R    | ASN-66                                      | S    | GLU-63; LYS-66                     |
| P3      | D    | TYR-59; TYR-159; TYR-7             | I    | TYR-159                                     | Y    | GLU-152                            |
| P4      | E    | /                                  | S    | TYR-159                                     | I    | /                                  |
| P5      | Y    | GLU-63; GLN-67                     | N    | SER-24                                      | P    | /                                  |
| P6      | S    | /                                  | I    | TYR-99                                      | F    | /                                  |
| P7      | S    | /                                  | K    | GLU-62                                      | H    | /                                  |
| P8      | D    | /                                  | N    | GLN-155                                     | Y    | /                                  |
| P9      | V    | /                                  | V    | /                                           | G    | GLU-152                            |
| P10     | T    | ARG-155                            | N    | GLN-155; TRP-156                            | G    | THR-80                             |
| P11     | T    | /                                  | K    | TRP-147                                     | N    | /                                  |
| P12     | L    | ASN-80; TYR-84                     | S    | /                                           | A    | LYS-146                            |
| P13     | /    | /                                  | Y    | ASN-77; ASN-80; TYR-84;<br>ASP-116; TYR-118 | I    | /                                  |
| P14     | /    | /                                  | /    | /                                           | K    | ASN-86                             |

**Figure S3.** Each amino acid of the epitopes P334, P352, and P366 interact with amino acid in the SLA-I allele pocket. Related to Figure 3.

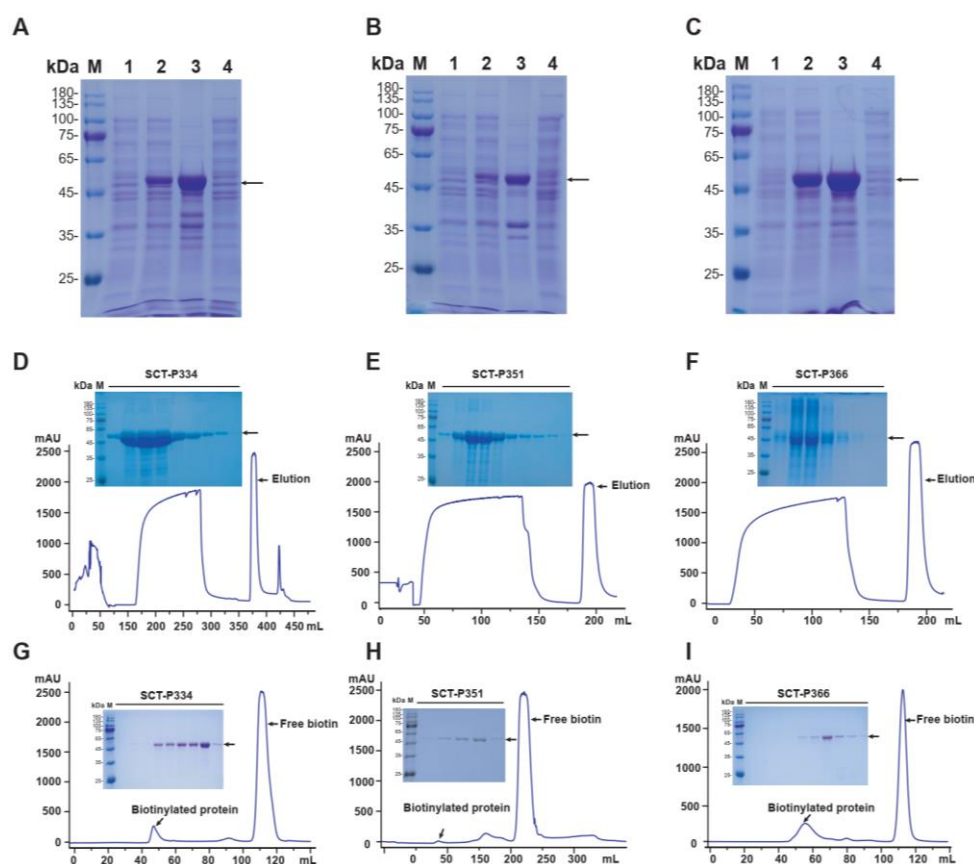

**Figure S4.** The expression and purification of tetramer protein was detected by SDS-PAGE. Related to Figure 3. (A, B, C) Tetra-334, Tetra-351, and Tetra-366, respectively. (D, E, F) SCT inclusion bodies were purified by Ni-affinity chromatography. (G, H, I) Biotinylation of SCT was purified by the AKT protein purification system using size exclusion chromatography. M, Marker; 1, Before induction; 2, After induction; 3, Inclusion body; 4, Supernatant; Black arrow shows the location of the target protein.

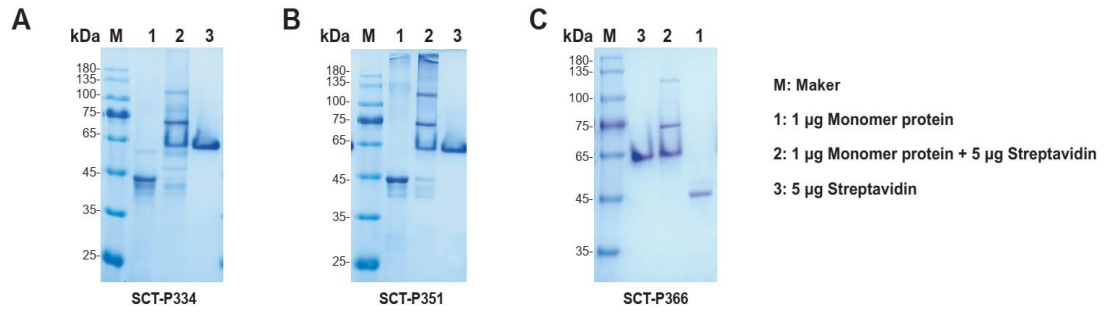

**Figure S5.** The biotinylation efficiency of the SLA-I-peptide complex was evaluated by SDS-PAGE gel-shift assays. Related to Figure 3.

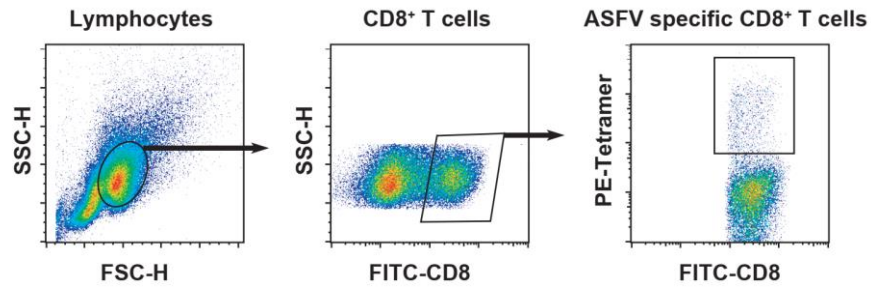

**Figure S6.** Gating strategy for PBMCs staining flow cytometry. Related to Figure 5.

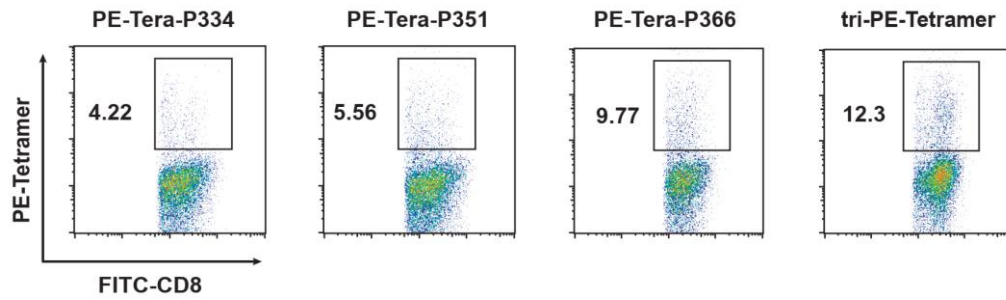

**Figure S7.** The proportion of CD8<sup>+</sup> specific T cells of surviving Pig 10# was measured by flow cytometry assays of PBMCs stained with PE-Tera-P334, PE-Tera-P351, PE-Tera-P366 and tri-PE-Tetramer. Related to Figure 5.

**Table S1.** The general information of the surviving pigs.

| No. | Pig number    | Days of age       | Sampling time | Storage condition |       |
|-----|---------------|-------------------|---------------|-------------------|-------|
|     |               |                   |               | PBMCs             | Serum |
| 1   | <b>Pig 2#</b> | <b>50-day-old</b> | 60 dpi*       | LN <sub>2</sub> * | -80°C |
| 2   | Pig 3#        | 50-day-old        | 58 dpi        | LN <sub>2</sub>   | -80°C |
| 3   | Pig 5#        | 50-day-old        | 63 dpi        | LN <sub>2</sub>   | -80°C |
| 4   | Pig 7#        | 50-day-old        | 60 dpi        | LN <sub>2</sub>   | -80°C |
| 5   | Pig 10#       | 50-day-old        | 62 dpi        | LN <sub>2</sub>   | -80°C |
| 6   | Pig 14#       | 50-day-old        | 65 dpi        | LN <sub>2</sub>   | -80°C |
| 7   | Pig 496#      | 50-day-old        | 48 dpi        | LN <sub>2</sub>   | -80°C |
| 8   | Pig 505#      | 50-day-old        | 43 dpi        | LN <sub>2</sub>   | -80°C |
| 9   | Pig 506#      | 50-day-old        | 50 dpi        | LN <sub>2</sub>   | -80°C |
| 10  | Pig B6#       | 50-day-old        | 40 dpi        | LN <sub>2</sub>   | -80°C |
| 11  | Pig B7#       | 50-day-old        | 55 dpi        | LN <sub>2</sub>   | -80°C |
| 12  | Pig S007#     | 50-day-old        | 55 dpi        | LN <sub>2</sub>   | -80°C |
| 13  | Pig S356#     | 50-day-old        | 51 dpi        | LN <sub>2</sub>   | -80°C |
| 14  | Pig S364#     | 50-day-old        | 48 dpi        | LN <sub>2</sub>   | -80°C |
| 15  | Pig S368#     | 50-day-old        | 48 dpi        | LN <sub>2</sub>   | -80°C |
| 16  | Pig S397#     | 50-day-old        | 41 dpi        | LN <sub>2</sub>   | -80°C |
| 17  | Pig S399#     | 50-day-old        | 58 dpi        | LN <sub>2</sub>   | -80°C |
| 18  | Pig S724#     | 50-day-old        | 66 dpi        | LN <sub>2</sub>   | -80°C |
| 19  | Pig S725#     | 50-day-old        | 66 dpi        | LN <sub>2</sub>   | -80°C |
| 20  | Pig S728#     | 50-day-old        | 66 dpi        | LN <sub>2</sub>   | -80°C |

\* days post infection (dpi); liquid nitrogen (LN<sub>2</sub>)
